# Supplementary material
Source: publisher site journal article supplement (https://static.cambridge.org/content/id/urn:cambridge.org:id:article:S1368980020000324/resource/name/S1368980020000324supp001.docx)
Supplement: Supplementary file 1 [file S1368980020000324supp001.docx]

**Appendix 2|**Weighted ORs (95% CIa) of hyperuricemia across quintiles of total retinol intake, NHANES 2009–2014.

|  | Cases/participants | Weighted prevalence (% ) | Crude | Model 1 | Model 2 |
| --- | --- | --- | --- | --- | --- |
| OR b(95% CI) | OR (95% CI) | OR (95% CI) |
| Total retinol intake（RAEc, mcg/d） |  |  |  |  |  |
| Q1(<279.50) | 188/1175 | 15.21 | 1.00(Ref.) | 1.00(Ref.) | 1.00(Ref.) |
| Q2(279.50-434.00) | 141/1176 | 11.90 | 0.75(0.54-1.04) | 0.74(0.54-1.03) | 0.77(0.55-1.06) |
| Q3(434.00-605.10) | 157/1172 | 14.10 | 0.92(0.67-1.25) | 0.90(0.65-1.25) | 1.00(0.70-1.43) |
| Q4(605.10-875.00) | 136/ 1175 | 12.04 | 0.76(0.57-1.01) | 0.70(0.52-0.95)* | 0.81(0.57-1.14) |
| Q5(≥875.00) | 122/ 1173 | 10.09 | 0.63(0.45-0.86)* | 0.54(0.39-0.75)* | 0.61(0.42-0.89)* |

aCI: confidence interval. bOR: odds ratio.

cRAE: retinol activity equivalents.

Model 1: adjusted for age, gender.

Model 2: adjusted for age, gender, race/ethnicity, BMI, smoking status, drinking status, education background, hypertension status, diabetes status,total energy intake, vigorous activities, TC, vitaminC intake,dietary fiber intake, magnesium intake . Results are survey-weighted. **p*<0.05
